## **microRNA profiling of mouse cortical progenitors and neurons reveals miR-486-5p as a novel regulator of neurogenesis**

Martina Dori<sup>1‡</sup>, Daniel Cavalli<sup>1</sup>, Mathias Lesche<sup>2</sup>, Simone Massalini<sup>1</sup>, Leila Haj Abdullah Alieh<sup>1</sup>, Beatriz Cardoso de Toledo<sup>1</sup>, Sharof Khudayberdiev<sup>3</sup>, Gerhard Schratt<sup>3</sup>, Andreas Dahl<sup>2</sup> and Federico Calegari<sup>1,\*</sup>

- 1) CRTD – Center for Regenerative Therapies Dresden, School of Medicine, TU Dresden; Fetcherstrasse 105, 01307, Dresden, Germany
- 2) DRESDEN-concept Genome Center c/o Center for Molecular and Cellular Bioengineering (CMCB), Technische Universität Dresden; Fetcherstrasse 105, 01307, Dresden, Germany
- 3) Institute for Physiological Chemistry, Biochemical-Pharmacological Center Marburg, Philipps-University of Marburg, Marburg, Germany

\* To whom correspondence should be addressed: [federico.calegari@tu-dresden.de](mailto:federico.calegari@tu-dresden.de)

Present Address: Martina Dori, Center for Genome Research, Department of Life Sciences, University of Modena and Reggio Emilia, 41100, Modena, Italy

Present Address: Gerhard Schratt, Institute for Neuroscience, Department of Health Science and Technology, Swiss Federal Institute of Technology, 8057, Zurich, Switzerland

---

‡ The authors wish it to be known that, in their opinion, the first two authors should be regarded as joint First Authors

## 1 **ABSTRACT**

2 MicroRNAs (miRNAs) are short (~22 nt) single-stranded non-coding RNAs that  
3 regulate gene expression at the post-transcriptional level. Over the past years, many  
4 studies have extensively characterized the involvement of miRNA-mediated  
5 regulation in neurogenesis and brain development. However, a comprehensive  
6 catalog of cortical miRNAs cell-specifically expressed in progenitor types of the  
7 developing mammalian cortex is still missing. Overcoming this limitation, here we  
8 exploited a double reporter mouse line previously validated by our group to allow the  
9 identification of the transcriptional signature to neurogenic commitment and provide  
10 the field with the complete atlas of miRNAs expression in proliferating neural stem  
11 cells, neurogenic progenitors and newborn neurons during corticogenesis. By  
12 extending the currently known list of miRNAs expressed in the mouse brain by over  
13 two fold, our study highlights the power of cell type-specific analyses for the detection  
14 of transcripts that would otherwise be diluted out when studying bulk tissues. We  
15 further exploited our data by predicting putative novel miRNAs and validated the  
16 power of our approach by providing novel evidence for the involvement of miR-486  
17 as a novel player in brain development.

## 18 19 20 **INTRODUCTION**

21 MicroRNAs (miRNAs) are short (~22 nt) single-stranded non-coding RNAs that  
22 regulate gene expression at the post-transcriptional level (1,2). Canonical miRNAs  
23 derive from longer primary transcripts harboring a stem-loop that is processed by two  
24 RNase III enzymes: Drosha in the nucleus and Dicer in the cytoplasm (3,4).  
25 Eventually, mature miRNAs are loaded into the RNA-induced silencing complex

26 (RISC) (5,6) to destabilize or cleave complementary target messenger RNAs  
27 (mRNAs) thereby inhibiting their translation (7).

28 miRNA-mediated regulation of translation is far more than an adjustment of  
29 cellular protein levels, but rather an essential developmental mechanism. In fact, a  
30 number of mouse lines mutant for miRNA-processing enzymes or individual miRNAs  
31 showed dramatic phenotypes, ranging from impaired organogenesis to pre- and  
32 perinatal lethality (8-11). The effects of interfering with miRNA function were found to  
33 be particularly severe during brain development and leading to a decreased survival  
34 of neural progenitors and newborn neurons and ultimately causing cortical  
35 malformations (12-15). In addition, well-established regulatory loops are mediated by  
36 miRNAs such as in the synergistic effect of miR-9 and *let-7b* inducing neural  
37 progenitors differentiation by targeting the Tlx receptor (Nr2e1) (16,17) as well as  
38 down-regulating Hes1 and CyclinD1 as critical gene hubs controlling cell-cycle exit  
39 and enhancing differentiation (18,19). Moreover, it is well characterized the  
40 interaction of miR-9 with miR-124 to target the RE-1 Silencing Transcript factor  
41 (REST), a strong inhibitor of pro-neural genes (20-22). Many more examples are  
42 known of miRNAs controlling neurogenesis and brain development (23,24)  
43 highlighting the importance of studying their physiological expression patterns in  
44 different cell types of the developing cortex as a crucial step to gain insights into the  
45 pathways underlying their timely regulation and function. Remarkably, however, a  
46 comprehensive catalog of cortical miRNAs cell-specifically expressed in progenitor  
47 types and neurons is still missing.

48 The lack of a comprehensive catalog of miRNAs expression in specific populations  
49 of neural progenitor cells is due to many factors including technical limitation in the  
50 coverage of single-cell small RNA sequencing (25) and that essentially all previous  
51 high-throughput miRNA studies on neurogenesis used either microarrays or total

52 brain lysates (26-30). As a consequence, the resolution of previous studies was  
53 limited by the variety of probes printed on the microarrays or, alternatively, by the  
54 coexistence in time and space of different cell types of the developing brain. To  
55 overcome these limitations, we here exploited a previously described dual-reporter  
56 mouse line, which allows the isolation of different neural progenitor types and  
57 newborn neurons (31).

58 More specifically, with the progression of neurogenesis two distinct, lineage-  
59 related populations of neural progenitors coexist in the developing cortex: radial glia,  
60 proliferative progenitors (PP) that expand the stem cell pool by symmetric divisions  
61 and neurogenic, differentiative progenitors (DP) that divide to generate neurons (N)  
62 (32,33). In studying the fate and nature of each population, several studies have  
63 identified the expression of defined molecular markers in each cell type. In particular,  
64 and by taking advantage of *Btg2* and *Tubb3* expression, our group has generated a  
65 combinatorial, double-reporter mouse line in which RFP and or GFP expression  
66 allowed the isolation specifically of PP, DP and N based on their endogenous  
67 fluorescence (RFP<sup>-</sup>, RFP<sup>+</sup> and GFP<sup>+</sup>, respectively) (31).

68 Validation and use of this mouse line revealed to be very powerful in the  
69 identification of several new genes and biological processes regulating cortical  
70 development (31). This included the thorough characterization of the elusive class of  
71 long non-coding (34) and circular (35) RNAs, novel transcription factors involved in  
72 corticogenesis (36) and a comprehensive description of DNA methylation and  
73 hydroxymethylation as epigenetic marks tuning brain development (37).

74 Given the previously validated power of our approach, we here exploited this  
75 *Btg2::RFP/Tubb3::GFP* line to provide the field with a complete atlas of miRNAs  
76 expression in cortical progenitors and neurons of the mouse brain at embryonic day  
77 (E) 14.5 as a mid-stage of corticogenesis. Furthermore, and validating our approach,

78 we provide evidence for the involvement of miR-486 as a novel regulator of  
79 corticogenesis.

80

## 81 **MATERIALS AND METHODS**

### 82 **Animals and embryos dissection**

83 Mice were housed into the Biomedical Services Facility (BMS) of the MPI-CBG under  
84 standard conditions (12-hour light-dark cycle,  $22 \pm 2^\circ\text{C}$  temperature,  $55 \pm 10\%$   
85 humidity, food and water supplied *ab libitum*). All experimental procedures were  
86 performed according to local regulations and all animal experiments were approved  
87 by local authorities (Landesdirektion Sachsen; 24D-9168.11-1/41, 2008-16, 2011-11,  
88 TVV 39/2015, 13/2016 TVV and 16-2018).  $\text{Btg2}^{\text{RFP}}/\text{Tubb3}^{\text{GFP}}$  males were time-mated  
89 with C57BL/6J females, which were marked as E0.5 the morning that a spermatic  
90 plug was observed. Pregnant females were anesthetized using Isoflurane (Baxter)  
91 and sacrificed by cervical dislocation at E14.5. Brains of RFP/GFP double-positive  
92 embryos were collected and lateral cortices isolated after removal of meninges and  
93 ganglionic eminences. Plugged C57BL/6J females for *in utero* electroporation or  
94 RNA extraction for Northern blot were purchased from Janvier Labs. Mice were  
95 sacrificed at E14.5 or E15.5 and embryo brains and cortices were dissected as  
96 above.

97

### 98 **Cell dissociation and FAC-sorting**

99 Lateral cortices of RFP/GFP double-positive embryos were dissociated using Papain-  
100 based Neural Tissue Dissociation Kit (Miltenyi Biotech) according to the  
101 manufacturer's protocol. Cells were resuspended in 1 ml of ice-cold PBS and 10  $\mu\text{l}$  of  
102 7-AAD (BD Pharmingen) were added for dead cells discrimination. Sorting was  
103 performed by BD FACSAria<sup>TM</sup> III (BD Biosciences) with previously described gating

104 (31,35). A minimum of  $1 \times 10^6$  cells per sample was collected in PBS and centrifuged  
105 (300 g, 10 min at 4°C) before RNA extraction.

106

### 107 **RNA extraction**

108 For miRNA deep-sequencing, total RNA was isolated using Quick RNA Mini Prep kit  
109 (Zymo Research) from cells sorted as described above. RNA quality and integrity  
110 were assessed by Bioanalyzer (Agilent Genomics). RNA integrity values (RIN) were  
111 above 9.0. For Northern blots, total RNA was isolated by TRI Reagent (Sigma-  
112 Aldrich). Briefly, lateral cortices of all E14.5 embryos of one litter were pooled and  
113 lysed in 1 ml of TRI Reagent. Samples were added 200  $\mu$ l of chloroform, mixed and  
114 left at RT for 15 min before centrifugation at 12,000 g for 30 min at 4°C. Aqueous  
115 phases were transferred to new tubes and RNAs were precipitated by adding 500  $\mu$ l  
116 of 2-propanol. RNA pellets were washed with 1 ml of 75 % ethanol and eventually  
117 resuspended in 50  $\mu$ l of nuclease-free water.

118

### 119 **Library preparation and small RNA deep sequencing**

120 Library preparation was performed on 1  $\mu$ g of total RNA with NEB Next Small RNA  
121 Library Prep Kit. All cDNA libraries were prepared according to the manufacturer's  
122 specifications, including adapter ligation, first-strand cDNA synthesis, PCR  
123 enrichment and size selection. cDNA purity and concentration after gel extraction  
124 were measured by qPCR. Samples were sequenced on Illumina HiSeq 2500 and  
125 single-end 75-bp reads were obtained.

126

### 127 **Bioinformatics and statistical analyses**

128 Sequencing data were obtained for PP, DP and N in 3 biological replicates. After  
129 adapter removal, reads shorter than 30 bp were aligned to miRBase v.20 (38) using

130 gsnap (39). Alignment was performed in 3 consecutive steps: a) on mature miRNAs  
131 sequences, b) unmapped reads were extracted and c) aligned on precursor-miRNA.  
132 During all steps, no mismatches were allowed and multi-mapped reads discarded.  
133 Eventually, a table of read counts per mature miRNA (read count  $\geq 1$ ) was  
134 assembled. For novel miRNA prediction, all unmapped reads were extracted and  
135 aligned using miRDeep2 (40) on mouse genome (mm10). The R package DESeq2  
136 (41) was used for normalization of the read count table and further testing of  
137 differential expression. Mean counts from replicates were used for fold change (FC)  
138 calculations:  $\log_2FC$  values  $\geq 0.58$  or  $\leq -0.58$  were considered up- or down-  
139 regulation, respectively. Benjamini–Hochberg procedure was applied for multiple t-  
140 test adjustment and FDR values lower than 0.05 were considered significant. A  
141 minimum of 3 biological replicates was used for any other assessment presented in  
142 the manuscript. Statistical differences of mean values were calculated by two-tailed  
143 student t-test, assuming  $p < 0.05$  as significant.

144

### 145 **In utero electroporation**

146 LNA oligonucleotides (miRCURY LNA miRNA Inhibitors) were purchased from  
147 Exiqon and co-electroporated with pDSV-mRFPnls reporter plasmid (Lange et al.,  
148 2009). LNA sequences are reported in **Supplementary Table 1**. *In utero*  
149 electroporation was performed as previously described (42,43): C57BL/6J pregnant  
150 mice were anesthetized with isoflurane at E 13.5 and 1  $\mu$ l of DNA solution (10  $\mu$ M  
151 LNA, 0.8  $\mu$ M RFP plasmid) was injected into the embryo left ventricle, followed by the  
152 application of 6 electric pulses (30V and 50 ms each at 1 s intervals) through  
153 platinum electrodes using a BTX-830 electroporator (Genetronics).

154

155

## 156 **Immunohistochemistry**

157 After dissection, brains were fixed in 4 % paraformaldehyde in 0.1M phosphate buffer  
158 (PFA, pH=7.4) overnight at 4°C, cryoprotected in 30 % sucrose and cryosectioned  
159 (10 µm thick slices). Immunohistochemistry was performed as previously described  
160 (42) (**Supplementary Materials and Methods** and **Supplementary Table 2** for a list  
161 of used antibodies). Nuclei were counterstained with DAPI. Sections were imaged  
162 using an automated microscope (ApoTome; Carl Zeiss), pictures digitally assembled  
163 using Axiovision software (Carl Zeiss) and composites analyzed using Photoshop  
164 CS6 (Adobe).

165

## 166 **RESULTS**

167 **The comprehensive miRNome of neurogenic commitment** Aiming to profile  
168 global miRNA expression during cortical development, we isolated PP, DP and N  
169 (each in three biological replicates) from the lateral cortices of  
170 Btg2::RFP/Tubb3::GFP mouse embryos at E14.5, as previously described (31,35)  
171 (**Figure 1a**). Total RNA was used for cDNA library preparation and small RNAs were  
172 isolated by size selection, followed by 75-bp high-throughput sequencing. To  
173 assemble the catalog of cortical miRNAs, we aligned reads with gsnap (39) and used  
174 miRBase (v.20) as the most complete reference available to date (38) yielding an  
175 average of 1.5 million unique-mapped reads (51% of total). Within the mapped reads,  
176 we detected (defined to as reads  $\geq 1$ ) 1,058 mature miRNAs derived from 703  
177 precursor transcripts (pre-miRNA) corresponding to 55% and 59% of the 1,908  
178 mature and 1,186 pre-miRNAs reported in the reference, respectively. More  
179 specifically, 640 mature miRNAs were in common to all 3 cell-types while 49 (4.6%),  
180 58 (5.5%) and 129 (12.2%) were specific to PP, DP and N, respectively (**Figure 1a**).  
181 Notably, when compared to a previous study which reported 294 pre-miRNAs (read



182 count  $\geq 1$ ) expressed in the whole E15.5 mouse brain (30), our dataset included  
183 essentially all (96%) of these previously known cortical miRNAs and further doubled  
184 this list by including additional 421 pre-miRNAs. In turn, this highlights the power of  
185 cell type-specific analyses for the detection of transcripts that would otherwise be  
186 diluted out when studying bulk tissues.

187 Furthermore, given that 42% of our reads did not align to any known miRNA and  
188 recent studies reported the detection of novel miRNAs in both mice and humans  
189 (44,45), we hypothesized that some of our reads might derive from novel miRNAs not  
190 annotated in any database and used miRDeep2 (40) to investigate this possibility.  
191 The prediction performed by this tool is based on the putative miRNA primary  
192 structure and how reads are aligning to the precursor based on their biogenesis. With  
193 this assumption, reads coming from a putative novel miRNA will fall into three main  
194 categories: the mature sequence, the hairpin loop and the star sequence (22nt  
195 sequence resulting from the removal of the loop that is not loaded into Ago and  
196 degraded). If the combination of a possible hairpin precursor and mapping of the  
197 sequencing reads is not following this expected pattern, those reads are discarded.  
198 This resulted in the prediction of 163 putative novel miRNAs sequences (read count  
199  $\geq 1$ ) that for convenience were labeled as miR-n- followed by a progressive number  
200 as identifier (**Figure 1a** and **Supplementary File S1**).

201 Next, we sought to select and validate some of these predicted miRNAs. To this  
202 end, we first chose those showing a higher consistency in detection among biological  
203 replicates (i.e. at least 2 out of 3 samples from the same cell type) reducing our initial  
204 list of 163 to 22 candidates. Next, we rank-ordered this refined cohort of putative  
205 novel miRNAs based on their average expression across cell populations selecting  
206 the top 8 for validation by Northern blot with radioactive probes (**Supplementary**  
207 **Table 1**). Among these, we confirmed the expression of 5 showing a size in the

208 range of 90-150 nt (**Supplementary Figure S1a**; note that in some lanes two miR-n  
209 are probed with identical sequence but derived from different loci) which is  
210 inconsistent with the known size of either mature or pre-miRNA (20-25 nt and ~60 nt,  
211 respectively) and more in line with that of other small RNAs including t-, sn- or sno-  
212 RNAs. Although not excluding the possibility that other novel miRNAs might be  
213 present in our list, this exclusion of 8 out of 8, top-ranking putative novel miRNAs made  
214 us conclude that our catalog of mouse cortical miRNAs is virtually complete.

215 As a next step, we validated the robustness of our datasets following a two-step  
216 approach. First, we normalized read numbers using DESeq2 (median-ratio  
217 normalization) (41) to account for differences in sequencing depth. Upon  
218 normalization, principal component analysis (PCA) showed a clear separation of the  
219 three cell types, which distributed according to lineage differentiation (PP→DP→N)  
220 for the component displaying the highest variance (PC1) (**Figure 1b**). Second, we  
221 selected 6 miRNAs known to play key roles in neurogenesis and compared their  
222 normalized expression measured by deep sequencing with their tissue distribution  
223 assessed by *in situ* hybridization (ISH) data from Eurexpress (46). We observed a  
224 nearly perfect overlap between our sequencing and ISH data in all cases, regardless  
225 of whether the miRNA was uniformly expressed throughout the cortex (miR-9-5p and  
226 miR-17-5p), enriched in either progenitors (miR-92b-3p, miR-92a-3p and let-7b-5p)  
227 or neurons (miR-124-3p) (**Figure 1c** and **Supplementary Figure S1b**).

228 Taken together, our results provide evidence for an overall complete catalog of  
229 miRNA expression in cortical cell types during mouse development, more than  
230 doubling the previously known list of 292 cortical miRNA precursors (30) by detecting  
231 421 additional ones and for a total of 703 transcripts.

232

233

## 234 **Differentially expressed miRNAs**

235 The fine resolution of our system gave us the opportunity to assess differential  
236 miRNA expression at single population level during lineage commitment  
237 **(Supplementary File S2)**. Therefore, by comparing the PP-DP and DP-N transitions,  
238 we identified miRNAs that were up- or down-regulated by >1.5-fold (i.e. log<sub>2</sub> fold  
239 change  $\geq 0.58$  or  $\leq -0.58$ , respectively, FDR <5%) in one cell type compared to its  
240 parental population. As observed previously for linear and circular transcripts (31,35),  
241 only a small fraction of miRNAs showed a significant change between PP-DP (7%)  
242 and DP-N (17%) while the majority of those up- or down-regulated between PP-DP  
243 continued to follow the same trend of up- or down-regulation, respectively, between  
244 DP-N **(Figure 2)**.

245 Furthermore, by analyzing coding and long non-coding transcripts, our group  
246 previously concluded that a transient up- or down-regulation specifically in DP  
247 compared to both their PP progenitors and N progeny (on- and off-switch transcripts,  
248 respectively) represented a hallmark of functional commitment to the neurogenic  
249 lineage (31,36). Intriguingly, the subset of miRNAs displaying this on-/off-switch  
250 pattern of expression was strongly underrepresented, accounting for only 0.5% of the  
251 total and suggestive of a highly specific expression pattern. In fact, we only found 2  
252 on-switch (let-7b-5p and miR-135a-2-3p) and 2 off-switch (miR-486a-5p and miR-  
253 486b-5p) miRNAs **(Figure 2 and Figure 3)**. Supporting our conclusion that on-/off-  
254 switch transcripts are functionally involved in neurogenic commitment, both let-7b  
255 and miR-135a-2 are well known to be key regulators of neurogenesis (17,47). In  
256 contrast, while it has been shown that miR-486a and miR-486b promote myoblast  
257 differentiation (48) and are involved in regulatory pathways of ectodermal-derived  
258 tissues (49,50), no neurogenesis-related function has ever been reported for these  
259 two miRNAs to date.

260 With regard to their genomic location, we observed that all 4 switch miRNAs were  
261 intragenic. In particular, let-7b-5p and miR-135a-2-3p were processed, respectively,  
262 from lncRNAs AC162302.2 and Rmst (which mediates Sox2-dependent progenitors  
263 proliferation) (51). Similarly, miR-486a-5p and miR-486b-5p were processed from  
264 Ankirin1 (Ank1) and the predicted gene Gm15816, respectively. Interestingly, miR-  
265 486a-5p and miR-486b-5p shared the same mature sequence, despite originating  
266 from different pre-miRNAs transcribed from opposite strands of the same genomic  
267 locus. Unsurprisingly, when analyzing the expression pattern of the host genes of  
268 switch miRNAs (data retrieved from (31)), we found a high degree of overlap in their  
269 differential expression within different cell populations (**Figure 3**). This was consistent  
270 with previous observations of our group on long non-coding and circular RNAs (cite-  
271 cite) in which intragenic, switch genes were found to be regulated together in a  
272 similar fashion at the level of a common “switch locus”.

### 273 274 **The off-switch miR-486a/b-5p is a novel regulator of neurogenesis**

275 The absence of any known function for miR-486a/b-5p in neural stem cells or brain  
276 development, together with their intriguing switch expression pattern, drove us to  
277 investigate their potential functional role during corticogenesis and, by this, also  
278 attempting to validate the power of our miRnome atlas of cortical cell types. After  
279 validating the expression of miR486a/b-5p by qRT-PCR on FAC-sorted PP, DP and  
280 N of the E14.5 cortex (**Supplementary Figure 2a**), we used locked nucleic acids  
281 (LNA) to inhibit their activity and, hence, address their functional role. First, we  
282 confirmed the silencing efficacy of LNA-486 by luciferase assay on two validated  
283 targets of miR-486a/b-5p (Foxo1 and Pten) (52,53) (see Materials and Methods and  
284 **Supplementary Figure S2b and c**). Then, to investigate the effect of miR-486a/b-5p  
285 inhibition on cortical progenitors, we *in utero* electroporated E13.5 mouse embryos

286 with LNA-486 or LNA-control together with an RFP-reporter plasmid. Brains were  
287 collected 48h later and distribution of electroporated cells (identified as RFP+) was  
288 assessed as a readout of neurogenesis and neuronal migration.

289 LNA-486 significantly altered cell distribution across all cortical layers. Particularly  
290 affected were the subventricular zone and the cortical plate that showed a 1.6 fold  
291 increase (from  $12\pm 1$  to  $20\pm 2\%$ ;  $p<0.01$ ), and a comparable decrease (from  $20\pm 3$  to  
292  $12\pm 2\%$ ;  $p<0.01$ ), in RFP+ cells after delivery of LNA-486 relative to brains  
293 electroporated with control LNAs, respectively (**Figure 4a**). By using Tbr2 as a  
294 marker to identify basal from apically progenitors, we observed a significant increase  
295 in both cell types at the expense of neurons. In particular, apical progenitors  
296 increased by 1.2 fold (from  $14\pm 0.2$  to  $18\pm 2\%$ ;  $p<0.05$ ), whereas basal increased by  
297 1.3 fold (from  $21\pm 2$  to  $28\pm 4\%$ ;  $p<0.05$ ). This was paralleled by a comparable, 1.2 fold  
298 decrease in neurons found in the neuronal layers (from  $66\pm 2$  to  $54\pm 2\%$ ;  $p<0.001$ )  
299 (**Figure 4b**). Notably, no major effect was found neither at the level of cell survival  
300 nor migration of newborn neurons as assessed by activated-caspase  
301 immunoreactivity or upon 24h birthdating with BrdU (data not shown) and hinting at a  
302 cell fate-specific effect upon inhibition of miR-486a/b-5p activity.

303 Taken together, characterization of the miRNome of progenitor cell types and  
304 neurons revealed a powerful tool to identify new miRNAs involved in cortical  
305 development allowing us to describe for the first time the functional effects of  
306 interfering with the activity of miR-486a/b.

307

## 308 **DISCUSSION**

309 Here we provided a complete catalog of miRNAs expression in neural progenitors  
310 and newborn neurons during cortical development and validated our resource by

311 identifying a new player in neural stem cell fate specification: the switch miR-486a/b-  
312 5p.

313 Since the discovery of miRNAs as critical regulators of translation (7), many  
314 groups attempted to obtain atlases of their expression during brain development. The  
315 use of microarrays offered a first approach toward this goal (26-29) but was limited  
316 by a previous knowledge about the sequence of such miRNAs. Next-generation  
317 sequencing overcame this limitation and significantly increased the number of known  
318 miRNAs (30). However, previous studies remained limited either to the use of cell  
319 cultures or to analyses of whole brain lysates due to a lack of systems to discriminate  
320 between different cellular subtypes coexisting in time and space during  
321 corticogenesis. Even with the advent of single-cell sequencing, the study of small  
322 RNAs remains hindered by two major technical limitations that a) drop-seq is  
323 currently applicable only to poly(A)-RNAs and b) library preps with <1,000 cells  
324 display extremely poor coverage (25).

325 Here we exploited the Btg2::RFP/Tubb3::GFP mouse line as a well-established  
326 tool used by our group in previous studies to characterize the molecular signature of  
327 neurogenic commitment (34-37). By doing so, our group identified switch transcripts  
328 belonging to several classes of RNAs and including coding, long non-coding and  
329 circular RNAs and in most cases showing their functional roles in brain development  
330 (31,35,36). Continuing this line of research, here not only we provided the field with a  
331 validated and overall complete catalogue of cortical miRNAs at single-population  
332 level but also identified in miR-486a/b-5p a novel regulator of neurogenesis. We hope  
333 that future studies will be able to dissect the molecular mechanisms underlying this  
334 novel cortical, switch miRNA and that the field in general will profit from this novel  
335 resource.

336

337 **ACCESSION NUMBERS**

338 Sequencing data generated during the current study are available at GEO repository  
339 (GSE142253)

340

341 **ACKNOWLEDGMENTS**

342 We thank the MPI-CBG and CRTD facilities for maintenance of the mouse lines,  
343 sequencing and FACS.

344

345 **FUNDINGS**

346 This work was supported by the CRTD, TU Dresden, DFG CA893/9-1, a DIGS-BB  
347 fellowship to MD and DC and by the Italian Epigenomics Flagship Project (Epigen) of  
348 the Italian Ministry of Education, University and Research.

349

350 **AUTHORS CONTRIBUTION**

351 FC, MD and DC conceived the project; MD carried out the bioinformatic analyses  
352 (supported by ML and AD) and DC performed experiments with the help of and SM,  
353 LHAA and BCT. SK and GS performed the Northern Blot. FC, MD and DC wrote the  
354 manuscript. All authors approved the manuscript.

355

356 **CONFLICTS OF INTEREST**

357 Authors declare no conflicts of interests.

358

359 **REFERENCES**

360 1. Lee, R.C., Feinbaum, R.L. and Ambros, V. (1993) The *C. elegans*  
361 heterochronic gene *lin-4* encodes small RNAs with antisense complementarity  
362 to *lin-14*. *Cell*, **75**, 843-854.



- 363 2. Wightman, B., Ha, I. and Ruvkun, G. (1993) Posttranscriptional regulation of  
364 the heterochronic gene *lin-14* by *lin-4* mediates temporal pattern formation in  
365 *C. elegans*. *Cell*, **75**, 855-862.
- 366 3. Kim, V.N. (2005) MicroRNA biogenesis: coordinated cropping and dicing. *Nat*  
367 *Rev Mol Cell Biol*, **6**, 376-385.
- 368 4. Han, J., Lee, Y., Yeom, K.-H., Nam, J.-W., Heo, I., Rhee, J.-K., Sohn, S.Y.,  
369 Cho, Y., Zhang, B.-T. and Kim, V.N. (2006) Molecular basis for the recognition  
370 of primary microRNAs by the Drosha-DGCR8 complex. *Cell*, **125**, 887-901.
- 371 5. Meister, G., Landthaler, M., Peters, L., Chen, P.Y., Urlaub, H., Lührmann, R.  
372 and Tuschl, T. (2005) Identification of novel argonaute-associated proteins.  
373 *Curr Biol*, **15**, 2149-2155.
- 374 6. Liu, J., Rivas, F.V., Wohlschlegel, J., Yates, J.R., 3rd, Parker, R. and Hannon,  
375 G.J. (2005) A role for the P-body component GW182 in microRNA function.  
376 *Nat Cell Biol*, **7**, 1261-1266.
- 377 7. Bartel, D.P. (2004) MicroRNAs: genomics, biogenesis, mechanism, and  
378 function. *Cell*, **116**, 281-297.
- 379 8. Bernstein, E., Kim, S.Y., Carmell, M.A., Murchison, E.P., Alcorn, H., Li, M.Z.,  
380 Mills, A.A., Elledge, S.J., Anderson, K.V. and Hannon, G.J. (2003) Dicer is  
381 essential for mouse development. *Nat Genet*, **35**, 215-217.
- 382 9. Wang, Y., Medvid, R., Melton, C., Jaenisch, R. and Blelloch, R. (2007)  
383 DGCR8 is essential for microRNA biogenesis and silencing of embryonic stem  
384 cell self-renewal. *Nat Genet*, **39**, 380-385.
- 385 10. Morita, S., Horii, T., Kimura, M., Goto, Y., Ochiya, T. and Hatada, I. (2007)  
386 One Argonaute family member, *Eif2c2* (*Ago2*), is essential for development  
387 and appears not to be involved in DNA methylation. *Genomics*, **89**, 687-696.
- 388 11. Chong, M.M.W., Rasmussen, J.P., Rudensky, A.Y. and Littman, D.R. (2008)  
389 The RNaseIII enzyme Drosha is critical in T cells for preventing lethal  
390 inflammatory disease. *J Exp Med*, **205**, 2005-2017.
- 391 12. De Pietri Tonelli, D., Calegari, F., Fei, J.-F., Nomura, T., Osumi, N.,  
392 Heisenberg, C.-P. and Huttner, W.B. (2006) Single-cell detection of  
393 microRNAs in developing vertebrate embryos after acute administration of a  
394 dual-fluorescence reporter/sensor plasmid. *Biotechniques*, **41**, 727-732.
- 395 13. Kawase-Koga, Y., Otaegi, G. and Sun, T. (2009) Different timings of Dicer  
396 deletion affect neurogenesis and gliogenesis in the developing mouse central  
397 nervous system. *Dev Dyn*, **238**, 2800-2812.
- 398 14. Babiarz, J.E., Hsu, R., Melton, C., Thomas, M., Ullian, E.M. and Blelloch, R.  
399 (2011) A role for noncanonical microRNAs in the mammalian brain revealed  
400 by phenotypic differences in *Dgcr8* versus *Dicer1* knockouts and small RNA  
401 sequencing. *RNA*, **17**, 1489-1501.
- 402 15. Marinaro, F., Marzi, M.J., Hoffmann, N., Amin, H., Pelizzoli, R., Niola, F.,  
403 Nicassio, F. and De Pietri Tonelli, D. (2017) MicroRNA-independent functions  
404 of DGCR8 are essential for neocortical development and TBR1 expression.  
405 *EMBO Rep*, **18**, 603-618.



- 406 16. Zhao, C., Sun, G., Li, S. and Shi, Y. (2009) A feedback regulatory loop  
407 involving microRNA-9 and nuclear receptor TLX in neural stem cell fate  
408 determination. *Nat Struct Mol Biol*, **16**, 365-371.
- 409 17. Zhao, C., Sun, G., Li, S., Lang, M.-F., Yang, S., Li, W. and Shi, Y. (2010)  
410 MicroRNA let-7b regulates neural stem cell proliferation and differentiation by  
411 targeting nuclear receptor TLX signaling. *Proc Natl Acad Sci U S A*, **107**,  
412 1876-1881.
- 413 18. Tan, S.-L., Ohtsuka, T., González, A. and Kageyama, R. (2012) MicroRNA9  
414 regulates neural stem cell differentiation by controlling Hes1 expression  
415 dynamics in the developing brain. *Genes Cells*, **17**, 952-961.
- 416 19. Ghosh, T., Aprea, J., Nardelli, J., Engel, H., Selinger, C., Mombereau, C.,  
417 Lemonnier, T., Moutkine, I., Schwendimann, L., Dori, M. *et al.* (2014)  
418 MicroRNAs establish robustness and adaptability of a critical gene network to  
419 regulate progenitor fate decisions during cortical neurogenesis. *Cell Rep*, **7**,  
420 1779-1788.
- 421 20. Conaco, C., Otto, S., Han, J.-J. and Mandel, G. (2006) Reciprocal actions of  
422 REST and a microRNA promote neuronal identity. *Proc Natl Acad Sci U S A*,  
423 **103**, 2422-2427.
- 424 21. Visvanathan, J., Lee, S., Lee, B., Lee, J.W. and Lee, S.-K. (2007) The  
425 microRNA miR-124 antagonizes the anti-neural REST/SCP1 pathway during  
426 embryonic CNS development. *Genes Dev*, **21**, 744-749.
- 427 22. Laneve, P., Gioia, U., Andriotto, A., Moretti, F., Bozzoni, I. and Caffarelli, E.  
428 (2010) A minicircuitry involving REST and CREB controls miR-9-2 expression  
429 during human neuronal differentiation. *Nucleic Acids Res*, **38**, 6895-6905.
- 430 23. Barca-Mayo, O. and De Pietri Tonelli, D. (2014) Convergent microRNA actions  
431 coordinate neocortical development. *Cell Mol Life Sci*, **71**, 2975-2995.
- 432 24. Rajman, M. and Schratt, G. (2017) MicroRNAs in neural development: from  
433 master regulators to fine-tuners. *Development*, **144**, 2310-2322.
- 434 25. Faridani, O.R., Abdullayev, I., Hagemann-Jensen, M., Schell, J.P., Lanner, F.  
435 and Sandberg, R. (2016) Single-cell sequencing of the small-RNA  
436 transcriptome. *Nat Biotechnol*, **34**, 1264-1266.
- 437 26. Krichevsky, A.M., King, K.S., Donahue, C.P., Khrapko, K. and Kosik, K.S.  
438 (2003) A microRNA array reveals extensive regulation of microRNAs during  
439 brain development. *RNA*, **9**, 1274-1281.
- 440 27. Sempere, L.F., Freemantle, S., Pitha-Rowe, I., Moss, E., Dmitrovsky, E. and  
441 Ambros, V. (2004) Expression profiling of mammalian microRNAs uncovers a  
442 subset of brain-expressed microRNAs with possible roles in murine and  
443 human neuronal differentiation. *Genome Biol*, **5**, R13-R13.
- 444 28. Miska, E.A., Alvarez-Saavedra, E., Townsend, M., Yoshii, A., Sestan, N.,  
445 Rakic, P., Constantine-Paton, M. and Horvitz, H.R. (2004) Microarray analysis  
446 of microRNA expression in the developing mammalian brain. *Genome Biol*, **5**,  
447 R68-R68.
- 448 29. Nielsen, J.A., Lau, P., Maric, D., Barker, J.L. and Hudson, L.D. (2009)  
449 Integrating microRNA and mRNA expression profiles of neuronal progenitors  
450 to identify regulatory networks underlying the onset of cortical neurogenesis.  
451 *BMC Neurosci*, **10**, 98-98.

- 452 30. Ling, K.-H., Brautigan, P.J., Hahn, C.N., Daish, T., Rayner, J.R., Cheah, P.-S.,  
453 Raison, J.M., Piltz, S., Mann, J.R., Mattiske, D.M. *et al.* (2011) Deep  
454 sequencing analysis of the developing mouse brain reveals a novel  
455 microRNA. *BMC Genomics*, **12**, 176-176.
- 456 31. Aprea, J., Prenninger, S., Dori, M., Ghosh, T., Monasor, L.S., Wessendorf, E.,  
457 Zocher, S., Massalini, S., Alexopoulou, D., Lesche, M. *et al.* (2013)  
458 Transcriptome sequencing during mouse brain development identifies long  
459 non-coding RNAs functionally involved in neurogenic commitment. *EMBO J*,  
460 **32**, 3145-3160.
- 461 32. Kriegstein, A. and Alvarez-Buylla, A. (2009) The glial nature of embryonic and  
462 adult neural stem cells. *Annu Rev Neurosci*, **32**, 149-184.
- 463 33. Taverna, E., Götz, M. and Huttner, W.B. (2014) The cell biology of  
464 neurogenesis: toward an understanding of the development and evolution of  
465 the neocortex. *Annu Rev Cell Dev Biol*, **30**, 465-502.
- 466 34. Aprea, J., Lesche, M., Massalini, S., Prenninger, S., Alexopoulou, D., Dahl, A.,  
467 Hiller, M. and Calegari, F. (2015) Identification and expression patterns of  
468 novel long non-coding RNAs in neural progenitors of the developing  
469 mammalian cortex. *Neurogenesis (Austin)*, **2**, e995524-e995524.
- 470 35. Dori, M., Haj Abdullah Alieh, L., Cavalli, D., Massalini, S., Lesche, M., Dahl, A.  
471 and Calegari, F. (2019) Sequence and expression levels of circular RNAs in  
472 progenitor cell types during mouse corticogenesis. *Life Sci Alliance*, **2**,  
473 e201900354.
- 474 36. Artegiani, B., de Jesus Domingues, A.M., Bragado Alonso, S., Brandl, E.,  
475 Massalini, S., Dahl, A. and Calegari, F. (2015) Tox: a multifunctional  
476 transcription factor and novel regulator of mammalian corticogenesis. *EMBO*  
477 *J*, **34**, 896-910.
- 478 37. Noack, F., Pataskar, A., Schneider, M., Buchholz, F., Tiwari, V.K. and  
479 Calegari, F. (2019) Assessment and site-specific manipulation of DNA  
480 (hydroxy-)methylation during mouse corticogenesis. *Life Sci Alliance*, **2**,  
481 e201900331.
- 482 38. Kozomara, A. and Griffiths-Jones, S. (2014) miRBase: annotating high  
483 confidence microRNAs using deep sequencing data. *Nucleic Acids Res*, **42**,  
484 D68-D73.
- 485 39. Wu, T.D. and Nacu, S. (2010) Fast and SNP-tolerant detection of complex  
486 variants and splicing in short reads. *Bioinformatics*, **26**, 873-881.
- 487 40. Friedländer, M.R., Chen, W., Adamidi, C., Maaskola, J., Einspanier, R.,  
488 Knespel, S. and Rajewsky, N. (2008) Discovering microRNAs from deep  
489 sequencing data using miRDeep. *Nat Biotechnol*, **26**, 407-415.
- 490 41. Love, M.I., Huber, W. and Anders, S. (2014) Moderated estimation of fold  
491 change and dispersion for RNA-seq data with DESeq2. *Genome Biol*, **15**, 550-  
492 550.
- 493 42. Lange, C., Huttner, W.B. and Calegari, F. (2009) Cdk4/cyclinD1  
494 overexpression in neural stem cells shortens G1, delays neurogenesis, and  
495 promotes the generation and expansion of basal progenitors. *Cell Stem Cell*,  
496 **5**, 320-331.

- 497 43. Artegiani, B., Lindemann, D. and Calegari, F. (2011) Overexpression of cdk4  
498 and cyclinD1 triggers greater expansion of neural stem cells in the adult  
499 mouse brain. *J Exp Med*, **208**, 937-948.
- 500 44. Li, N., You, X., Chen, T., Mackowiak, S.D., Friedländer, M.R., Weigt, M., Du,  
501 H., Gogol-Döring, A., Chang, Z., Dieterich, C. *et al.* (2013) Global profiling of  
502 miRNAs and the hairpin precursors: insights into miRNA processing and novel  
503 miRNA discovery. *Nucleic Acids Res*, **41**, 3619-3634.
- 504 45. de Rie, D., Abugessaisa, I., Alam, T., Arner, E., Arner, P., Ashoor, H., Åström,  
505 G., Babina, M., Bertin, N., Burroughs, A.M. *et al.* (2017) An integrated  
506 expression atlas of miRNAs and their promoters in human and mouse. *Nat*  
507 *Biotechnol*, **35**, 872-878.
- 508 46. Diez-Roux, G., Banfi, S., Sultan, M., Geffers, L., Anand, S., Rozado, D.,  
509 Magen, A., Canidio, E., Pagani, M., Peluso, I. *et al.* (2011) A high-resolution  
510 anatomical atlas of the transcriptome in the mouse embryo. *PLoS Biol*, **9**,  
511 e1000582-e1000582.
- 512 47. Caronia-Brown, G., Anderegg, A. and Awatramani, R. (2016) Expression and  
513 functional analysis of the Wnt/beta-catenin induced mir-135a-2 locus in  
514 embryonic forebrain development. *Neural Dev*, **11**, 9-9.
- 515 48. Dey, B.K., Gagan, J. and Dutta, A. (2011) miR-206 and -486 induce myoblast  
516 differentiation by downregulating Pax7. *Mol Cell Biol*, **31**, 203-214.
- 517 49. Jee, M.K., Jung, J.S., Choi, J.I., Jang, J.A., Kang, K.S., Im, Y.B. and Kang,  
518 S.K. (2012) MicroRNA 486 is a potentially novel target for the treatment of  
519 spinal cord injury. *Brain*, **135**, 1237-1252.
- 520 50. Kurtenbach, S., Ding, W., Goss, G.M., Hare, J.M., Goldstein, B.J. and  
521 Shehadeh, L.A. (2017) Differential expression of microRNAs among cell  
522 populations in the regenerating adult mouse olfactory epithelium. *PLoS One*,  
523 **12**, e0187576-e0187576.
- 524 51. Ng, S.-Y., Bogu, G.K., Soh, B.S. and Stanton, L.W. (2013) The long  
525 noncoding RNA RMST interacts with SOX2 to regulate neurogenesis. *Mol*  
526 *Cell*, **51**, 349-359.
- 527 52. Small, E.M., O'Rourke, J.R., Moresi, V., Sutherland, L.B., McAnally, J.,  
528 Gerard, R.D., Richardson, J.A. and Olson, E.N. (2010) Regulation of PI3-  
529 kinase/Akt signaling by muscle-enriched microRNA-486. *Proc Natl Acad Sci U*  
530 *S A*, **107**, 4218-4223.
- 531 53. Wang, L.-S., Li, L., Li, L., Chu, S., Shiang, K.-D., Li, M., Sun, H.-Y., Xu, J.,  
532 Xiao, F.-J., Sun, G. *et al.* (2015) MicroRNA-486 regulates normal  
533 erythropoiesis and enhances growth and modulates drug response in CML  
534 progenitors. *Blood*, **125**, 1302-1313.

535

536

537

538

539 **FIGURE LEGENDS**

540 **Figure 1.** Assembly and validation of cortical miRNome. **a)** Outline of the steps taken  
541 to generate cortical miRNome: sorting of E14.5 PP, DP and N, followed by small  
542 RNA sequencing. Mature miRNAs were identified through alignment on miRBase  
543 and novel miRNAs were predicted by miRDeep2. **b)** Principal component analysis of  
544 DESeq2-normalized 100 most diverse miRNAs between biological replicates (1-3)  
545 and cell populations (proliferative progenitors, grey; differentiative progenitors, red;  
546 neurons, green). **c)** Sagittal sections of E14.5 cortices downloaded from Eurexpress.  
547 Magnifications of the lateral cortex are shown (bottom-right) to appreciate the extent  
548 of the overlap with miRNA expression data measured by deep sequencing  
549 (histograms). Error bars = s.d. N = 3.

550 **Figure 2.** Differential expression analysis. Representation of differentially expressed  
551 miRNAs in the three cell types (PP: grey; DP: red; N: green). Numbers indicate the  
552 number of miRNA in each group and percentages are calculated over the parental  
553 population. miRNAs not detected in PP or never detected in any cell type are also  
554 reported (top left and bottom left, respectively). Oblique lines represent a > 50%  
555 change ( $\log_2$  fold change  $\geq 0.58$  or  $\leq -0.58$ ) and FDR <5%, whereas horizontal lines a  
556 < 50% change or an FDR >5%. Bold lines are depicting on- and off- switch patterns.

557 **Figure 3.** Genes hosting switch miRNAs are depicted (black): blue arrows represent  
558 the direction of transcription, whereas black boxes and lines constitute exons and  
559 introns, respectively. Position and mature sequence of switch miRNAs are indicated  
560 in red. Expression patterns of miRNAs and host genes are reported (graphs) on the  
561 left.

562 **Figure 4.** Manipulation of miR-486a/b-5p. **(a,b)** Coronal sections of electroporated  
563 lateral cortices stained for RFP (electroporated cells, white), DAPI (all nuclei, blue)

564 (a) and Tbr2 (BP, green) (b). Histograms represent quantifications of cells distribution  
565 48 hours after electroporation of LNA-control (white) or LNA-486 (black)  
566 (histograms).

567 VZ: ventricular zone; SVZ: sub-ventricular zone; IZ: intermediate zone; CP: cortical  
568 plate. AP: apical progenitor (Tbr2<sup>-</sup> cells in VZ); BP: basal progenitor (Tbr2<sup>+</sup> cells in  
569 VZ and SVZ). Error bars = s.d. N ≥ 3. Individual dots represent biological replicates.

570 \*p<0.05 ; \*\*p<0.01; \*\*\*p<0.001. Scale bar = 25 μm.

571

572

573

# Figure 1 Dori M. & Cavalli D. *et al.*,

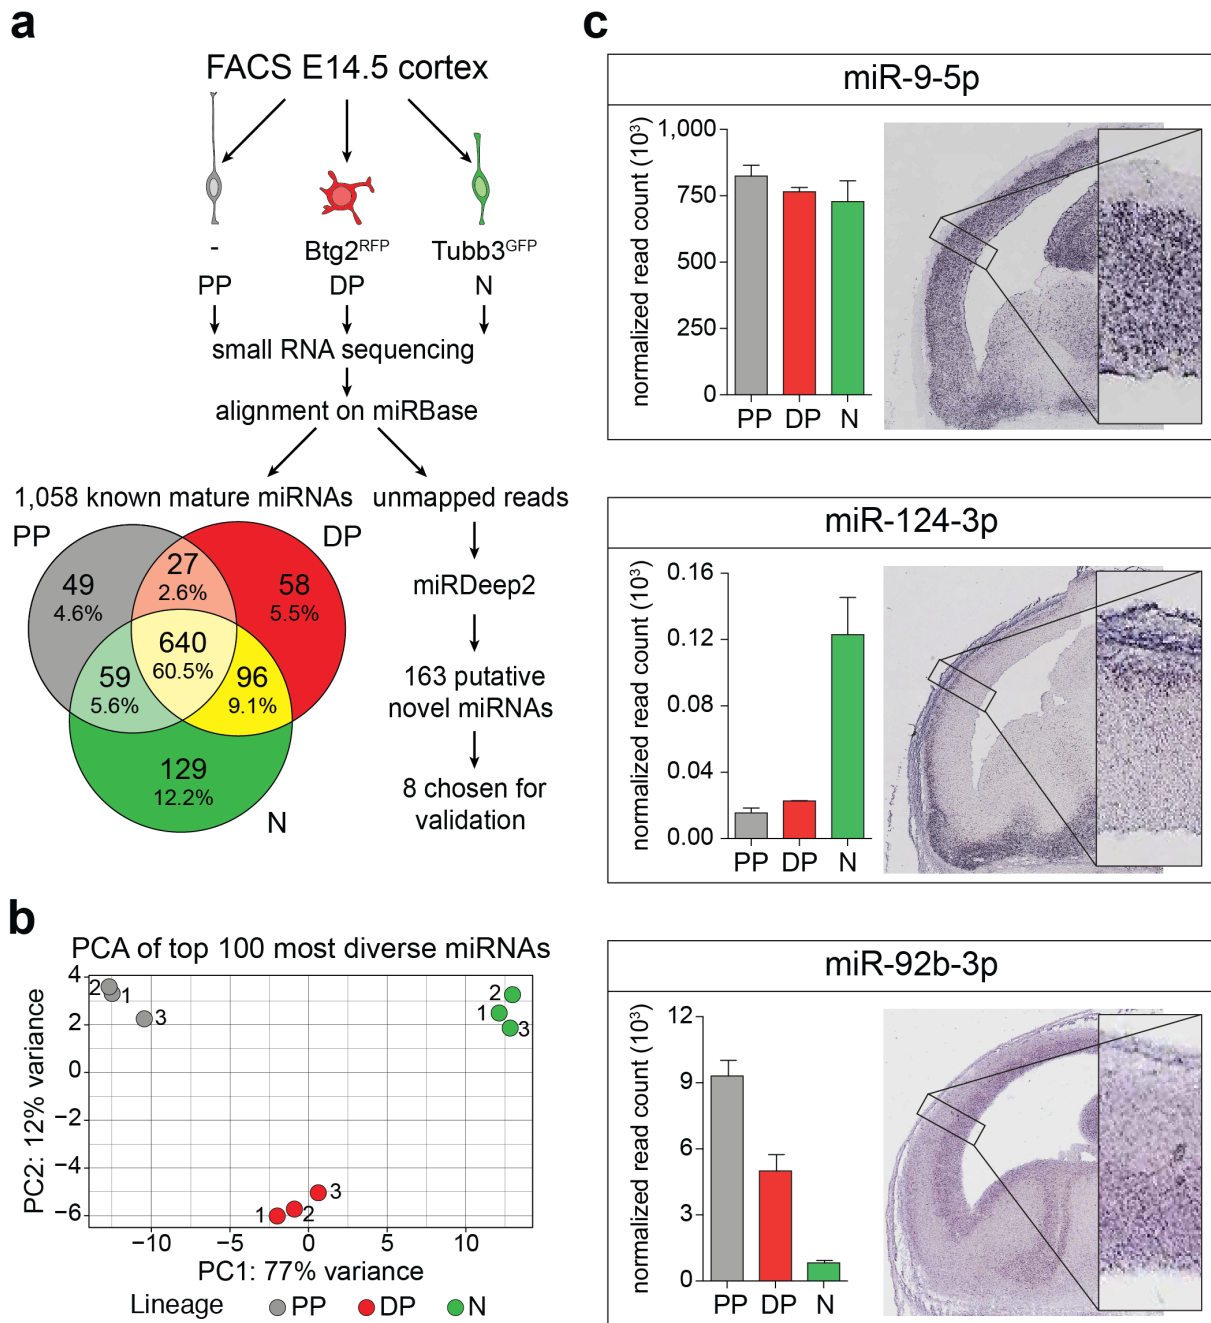

574

## Figure 2 Dori M. & Cavalli D. *et al.*,

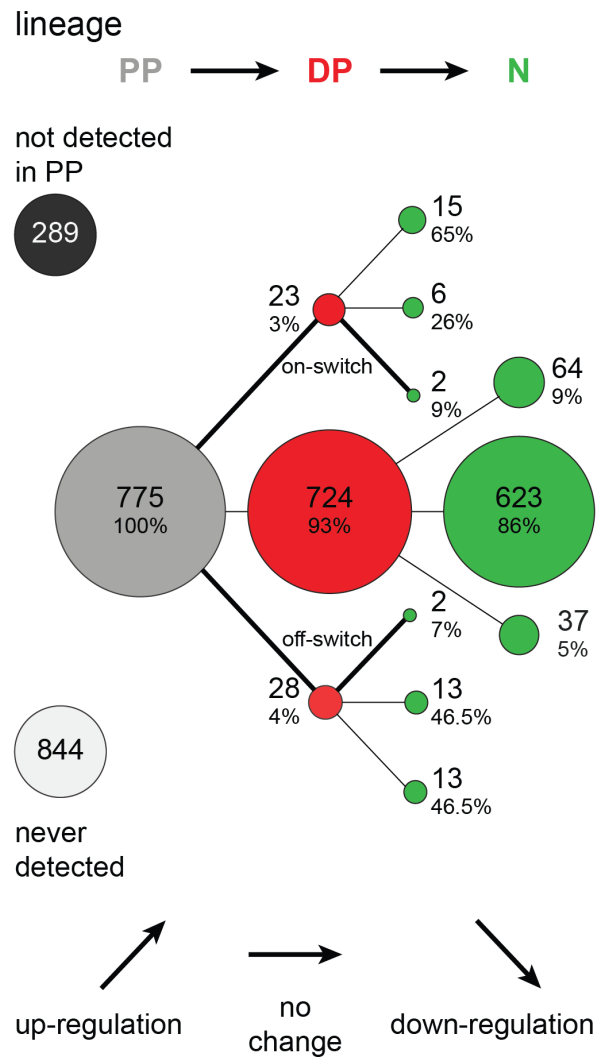

575



# Figure 3 Dori M. & Cavalli D. *et al.*,

## on-switch miRNAs

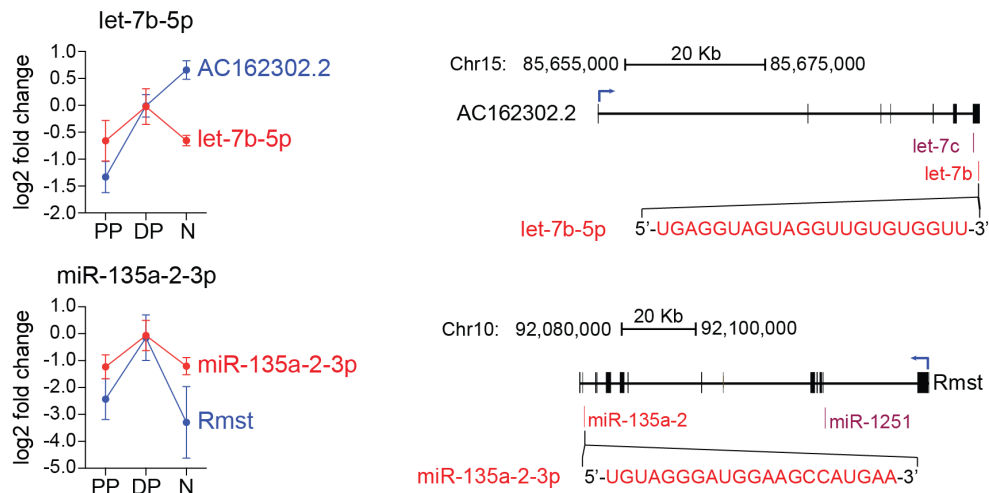

## off-switch miRNAs

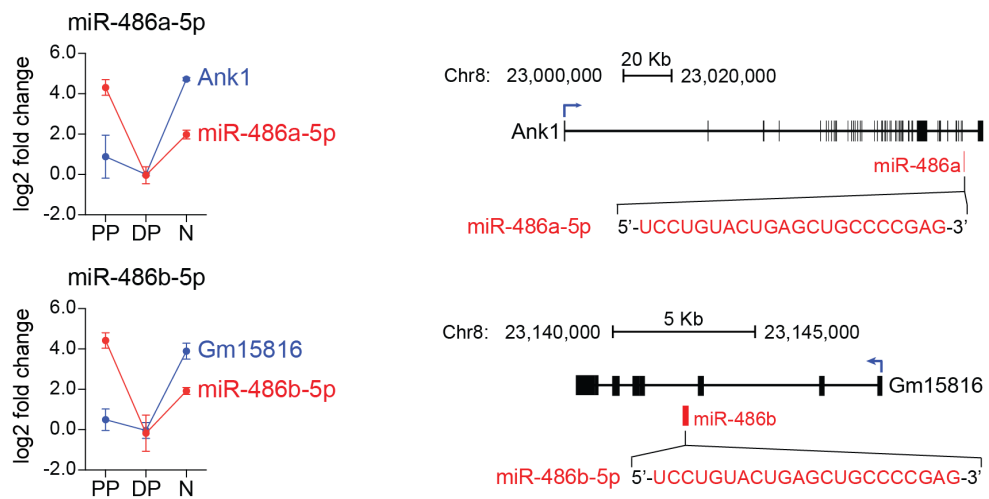

576



# Figure 4 Dori M. & Cavalli D. *et al.*,

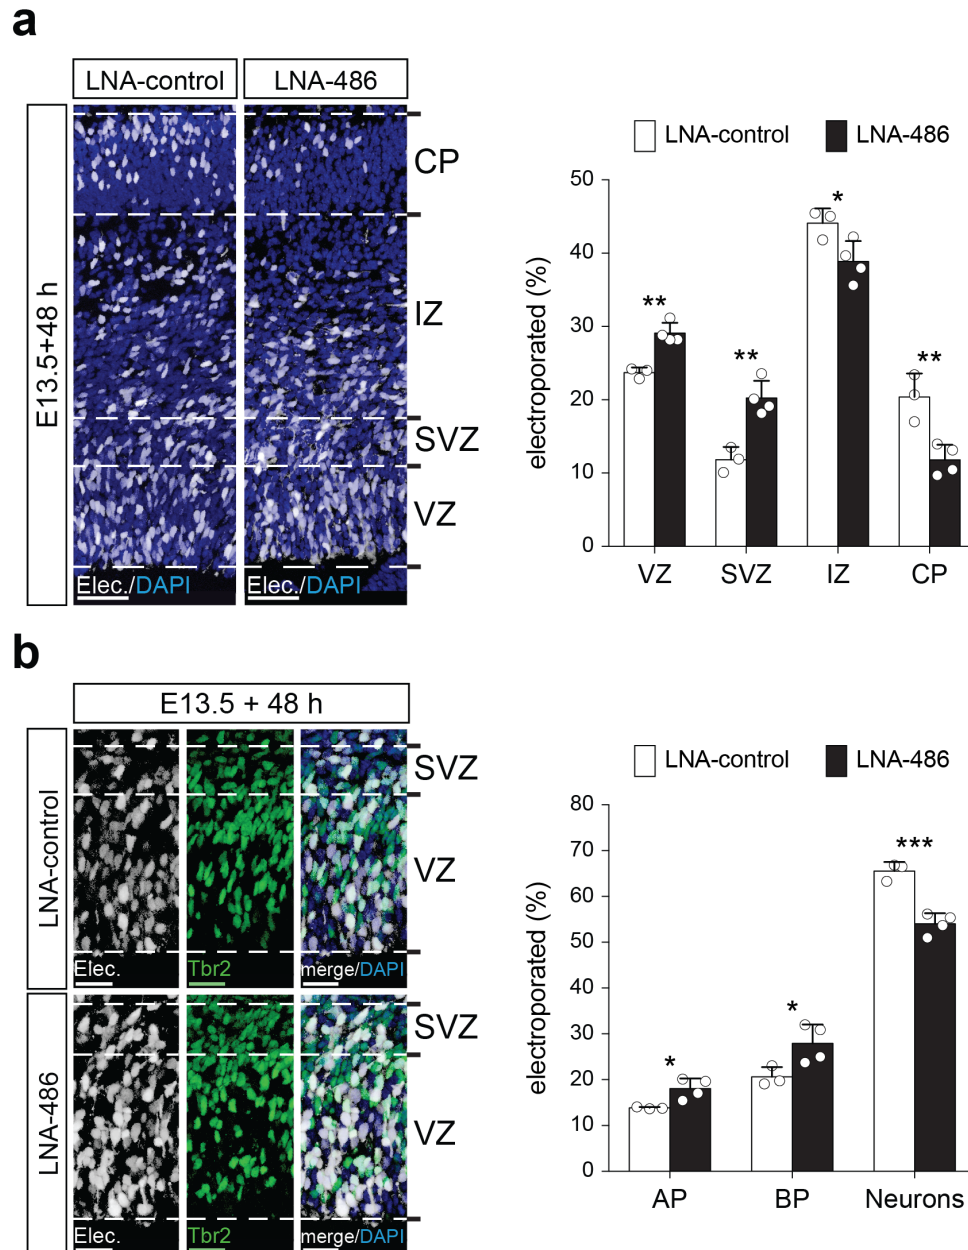

577
